# Supplementary material
Source: PubMed Central journal article supplement (PMC2440456)
Supplement: 107.125054_1.pdf [file 107.125054_1.pdf]

## Supplementary materials:

Table S1.  $\beta$ -strand,  $\beta$ -turn, PPII and coil probabilities at 298 K of the amino acid residues defined at least twice in the K3 sequence.

| $\beta$ -strand | N21 | N24 | F22 | F30 | L23 | L39 | L40 | V27 | V37 | S28 | S33 | D34 | D38 |
|-----------------|-----|-----|-----|-----|-----|-----|-----|-----|-----|-----|-----|-----|-----|
| trans-K3        | 10% | 14% | 12% | 19% | 15% | 12% | 10% | 18% | 14% | 9%  | 11% | 9%  | 20% |
| cis-K3          | 10% | 20% | 14% | 1%  | 20% | 13% | 10% | 6%  | 19% | 5%  | 2%  | 8%  | 23% |

| $\beta$ -turn | N21 | N24 | F22 | F30 | L23 | L39 | L40 | V27 | V37 | S28 | S33 | D34 | D38 |
|---------------|-----|-----|-----|-----|-----|-----|-----|-----|-----|-----|-----|-----|-----|
| trans-K3      | 1%  | 37% | 13% | 1%  | 29% | 27% | 21% | 19% | 30% | 12% | 11% | 15% | 22% |
| cis-K3        | 1%  | 15% | 19% | 1%  | 25% | 20% | 9%  | 27% | 16% | 22% | 21% | 24% | 17% |

| PPII     | N21 | N24 | F22 | F30 | L23 | L39 | L40 | V27 | V37 | S28 | S33 | D34 | D38 |
|----------|-----|-----|-----|-----|-----|-----|-----|-----|-----|-----|-----|-----|-----|
| trans-K3 | 35% | 6%  | 10% | 20% | 12% | 12% | 22% | 13% | 8%  | 9%  | 2%  | 12% | 12% |
| cis-K3   | 33% | 11% | 6%  | 12% | 12% | 12% | 30% | 12% | 11% | 7%  | 14% | 15% | 13% |

| Coil     | N21 | N24 | F22 | F30 | L23 | L39 | L40 | V27 | V37 | S28 | S33 | D34 | D38 |
|----------|-----|-----|-----|-----|-----|-----|-----|-----|-----|-----|-----|-----|-----|
| trans-K3 | 55% | 42% | 66% | 61% | 44% | 44% | 44% | 49% | 44% | 70% | 76% | 63% | 42% |
| cis-K3   | 56% | 53% | 61% | 86% | 43% | 56% | 51% | 55% | 53% | 66% | 62% | 52% | 46% |

Figure S1: The  $\beta$ -strand probability of each residue at 298 K using the four independent time intervals: 2-22 ns, 22-42 ns, 22-62 ns and 22-82 ns. (a) cis-K3 peptide, (b) trans-K3 peptide.

Figure S2: The time-averaged (22-82 ns) solvent accessible surface of each amino acid at 298 K using (a) all atoms, (b) the side-chain atoms, (c) the main-chain atoms.

Figure S3: Probability distribution of the number of side-chain - side-chain atomic contacts within the Ser28-Gly29-Phe30-His31-Pro32-Ser33 loop region in trans- and cis-K3 peptides.

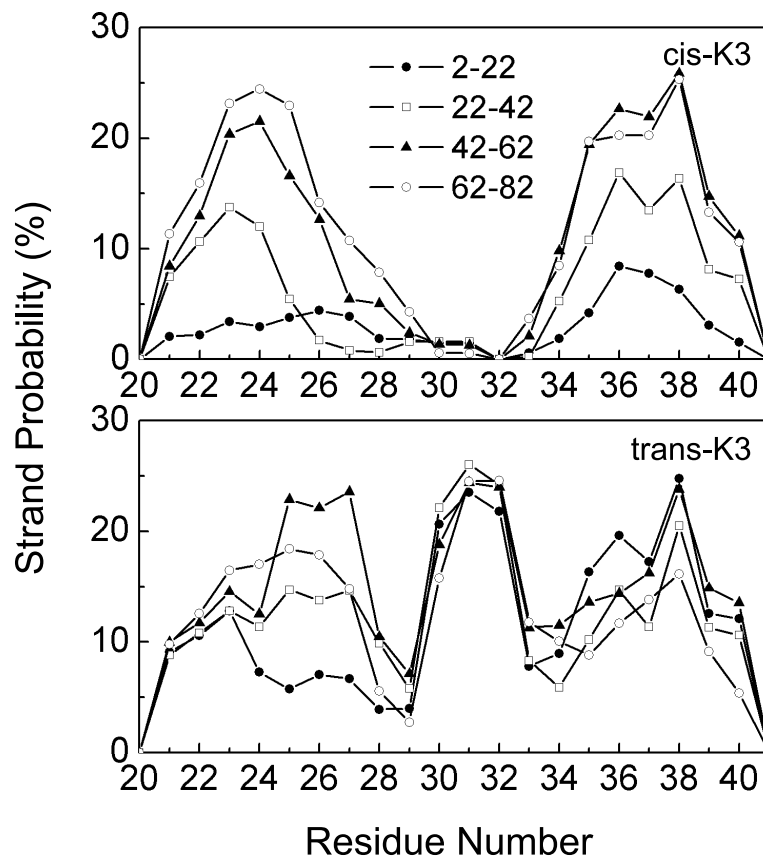

Figure S1

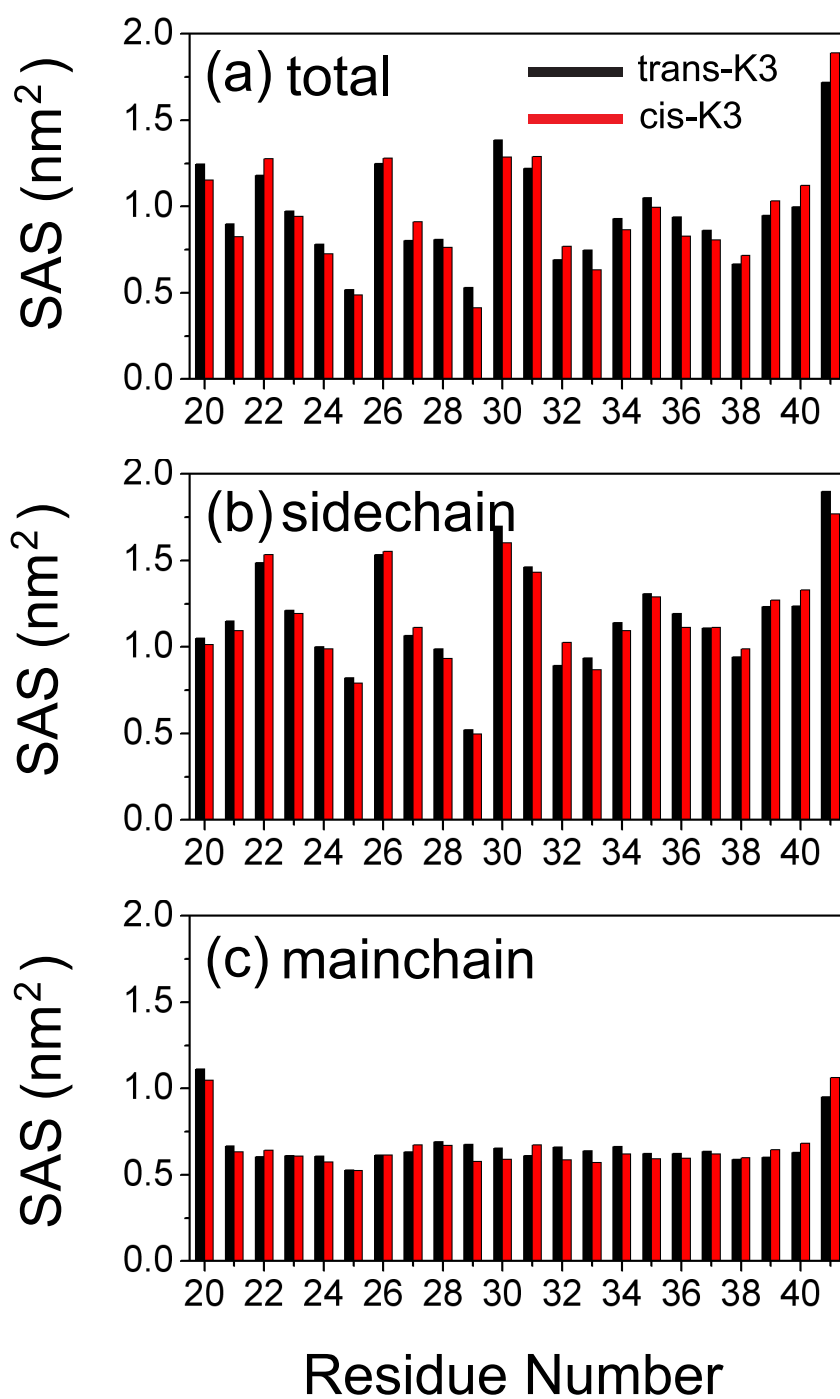

Figure S2

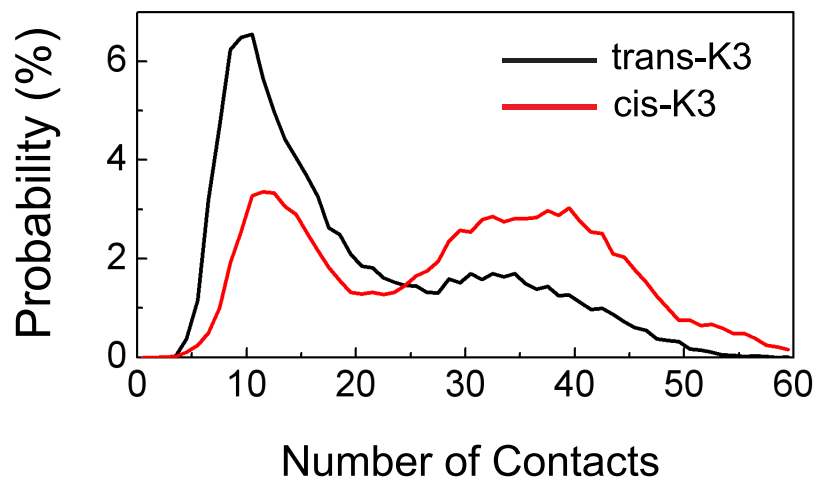

Figure S3
